# Supplementary material for: Nematode Extracellular Protein Interactome Expands Connections between Signaling Pathways
Source: PubMed Central journal article supplement — bioRxiv. 2024 Jul 13:2024.07.08.602367. Preprint. [Version 2] doi: 10.1101/2024.07.08.602367 (PMC11257444; doi:10.1101/2024.07.08.602367), 2024-07-13
Supplement: NIHPP2024.07.08.602367V2-supplement-1.pdf [file NIHPP2024.07.08.602367V2-supplement-1.pdf]

## 1195 SUPPLEMENTAL INFORMATION

### 1196 **Figure S1. Domain collection, protein expression and network analysis.**

1197 **A.** Signal peptide and transmembrane helix analysis of the *C. elegans* proteome (WS252 release)  
1198 shows that 23% of proteins have predicted signal peptides, and 44% of proteins are either  
1199 membrane-anchored or secreted.

1200 **B-E.** Expression testing of *D. melanogaster* (blue) and *C. elegans* (green) ectodomains in S2 cells  
1201 using the Metallothionein (MT) and Actin 5C (Ac) promoters. Rst D1 refers to the first  
1202 immunoglobulin domain of Rst. For MT-driven expression, transiently transfected cells were  
1203 induced with 0.8 mM CuSO<sub>4</sub> at 16 hours post-transfection. All transfections were collected 88  
1204 hours post-transfection for western blotting using a mouse primary anti-His antibody (1:2000) and  
1205 an Alexa Fluor 488-coupled donkey anti-mouse IgG secondary antibody (1:5000). Overall, the  
1206 Actin 5C promoter results in higher expression, but not in every case.

1207 **F.** Network of 185 interactions detected with a cutoff of  $z_{\min} > 8.4$  drawn using the organic layout  
1208 algorithm in Cytoscape, where node size relates to node degree (see the legend), and the edge  
1209 thickness scales to  $z_{\min}$ .

1210 **G.** The degree distribution of all the interactions depicted in F.

1211

### 1212 **Figure S2. MaxEnt model to filter the experimental data.**

1213 **A.** The normalized experimental data  $A_n$ .

1214 **B.** The mean of the statistical background model  $P$ .

1215 **C.** The difference between  $A_n$  and  $P$ . PPIs with z-score above intermediate (orange) and stringent  
1216 (purple) thresholds are shown in matrix form. Reciprocal PPIs are marked with dots (•) and non-  
1217 reciprocal PPIs are marked with an 'x'.

1218 **D.** The reciprocal ratio of interactions as a function of the chosen threshold of z-scores. The  
1219 maximum reciprocal ratio is achieved with  $z = 12.2$ .

1220 **E.** The reciprocal ratio as a function of the number of unique edges identified. The shading  
1221 represents  $n \pm SE$ , where  $n$  is the number of reciprocal edges. SE is calculated by the shot noise  
1222 as  $SE = \sqrt{n}$ .

1223

### 1224 **Figure S3. Interactions of axon guidance receptors and cues.**

1225 **A.** Image of the 384-well plate and absorbance at 650 nm for the ECIA experiment for selected  
1226 axon guidance-related proteins in Figure 3B.

1227 **B.** ECIA experiment for other guidance-related proteins. *D. melanogaster* Rst is a homodimeric  
1228 protein and serves as a control.

1229

### 1230 **Figure S4. The ZIG-insulin interactome.**

1231 **A.** Sequence alignment of four ZIGs and the fly ortholog, Impl2. ZIG-2 to -5 carry a disulfide  
1232 unique to all worm ZIGs.

1233 **B.** The ECIA construct design where ZIGs are depicted as bait and insulins as prey, as used in  
1234 the experiment presented in Figure 4B.

1235 **C, D.** Expression of all insulin and ZIG constructs used in the experiment presented in Figure 4B.  
1236 Expression of bait is shown in C and expression of prey in D.

1237 **E.** Kinetic fitting of SPR sensorgrams from Figure 4D with parameters.

1238 **F.** Superposition of three ZIG-4-INS-6 structures solved using three different crystal forms.

- 1239 **G.** The INS-6–ZIG-4 complex is compatible with insulins interacting with the L1 domains +  $\alpha$ CT  
1240 helix in insulin receptors. hIR: human insulin receptor; PDB ID: 3W11.  
1241 **H.** Structure of the active T-like IR<sub>2</sub>-insulin<sub>4</sub> structure from PDB ID: 6PXV. Four insulin-binding  
1242 sites are shown in red, yellow, blue and pink.  
1243 **I, J.** Insulin-bound ZIG-4 would severely clash with dimeric IR, regardless of insulin binding to site  
1244 1 (I), or site 2 (J).  
1245

1246 **Figure S5. Comparison of AlphaFold models of complexes discovered by the ECIA screen**  
1247 **with the structure of human ligand-bound neurotrophin receptor.**

- 1248 **A.** Structure of human neurotrophin receptor, TrkB (domain 5) bound to NT4/5 (PDB: 1HCF).  
1249 **B.** AlphaFold-predicted TRK-1 ectodomain bound to ZK856.6 at a 2:2 stoichiometry.  
1250 **C.** AlphaFold-predicted TRK-1 ectodomain bound to B0416.2 at a 2:2 stoichiometry.  
1251 **D.** PAE (Predicted Aligned Error) plots corresponding to models shown in B. and C. High ipTM  
1252 (interface predicted Template Modelling) scores indicate high-confidence predictions.  
1253 **E.** Kinetic fitting of SPR sensorgrams collected for the binding of B0222.11 to HIR-1, shown in  
1254 Figure 5C.  
1255

1256 **Figure S6. Interfaces observed in AlphaFold models of RIG-5-NLR-1 and RIG-5-PTP-3**  
1257 **complexes.**

- 1258 **A.** The AlphaFold-predicted interface of RIG-5 (ECD) bound to NLR-1 (D6).  
1259 **B.** The AlphaFold-predicted interface of RIG-5 (ECD) bound to PTP-3 (FN4-6). The RIG-5  
1260 residues mutated in the experiment presented in Figure 6H are shown in light cyan in A and B.  
1261

1262 **Figure S7. Binding experiments for NLG-1–NRX-1 complex.**

- 1263 **A.** SPR sensorgrams for soluble NRX-1 LNS6 domain binding to immobilized NLG-1 ECD.  
1264 **B.** Binding isotherm and  $K_D$  for binding shown in A.  
1265 **C.** Size-exclusion chromatography runs for NRX-1 LNS-6 (orange), NLG-1 ECD (green) and the  
1266 mixed sample (black).  
1267

1268 **Table S1. Excel file containing even more data too large to fit in a PDF.**

1269 Ectodomains used in the interactome study by gene, transcript and protein names, sequence,  
1270 domain composition, signal peptide and membrane anchoring predictions. TM: transmembrane.  
1271 Relative expression levels are measured and reported in columns P and Q for bait and prey  
1272 constructs, respectively.  
1273

1274 **Table S2. Excel file containing even more data too large to fit in a PDF.**

- 1275 **A.** Symmetrized z-scores using the MaxEnt method.  
1276 **B.** Asymmetric z-scores using the MaxEnt method.  
1277

1278 **Table S3. Excel file containing even more data too large to fit in a PDF.**

1279 List of interactions observed in the high-throughput ECIA experiment using our new MaxEnt  
1280 method with 2-hour absorbance measurements. Interactions with only one orientation with  $z > 3$   
1281 are labeled pink in column G. For comparison, scoring according to our old method, geometric  
1282 mean of trimmed z-scores ( $\sqrt{(z_1 \times z_2)_{old}}$ ) (Özkan, et al. *Cell*, 2013), are given in H, where a score  
1283 of  $> 20$  was considered significant. Column I reports if the interaction or an orthologous one was

1284 reported before, based on a literature search. Alphafold-multimer (Colabfold version 1.5.2) iPTM  
1285 scores for a subset of interacting pairs are in column J.  
1286

1287 **Table S4. Excel file containing even more data too large to fit in a PDF.**

1288 **A.** Canonical neighbors for every ectodomain tested, protein/sequence names in top row in bold.

1289 **B.** All neighbors for every ectodomain tested, protein/sequence names in top row in bold.  
1290

1291 **Table S5.** Data and refinement statistics for x-ray crystallography of the ZIG-4–INS-6 complex.  
1292

1293 **Table S6. Excel file containing even more data too large to fit in a PDF.**

1294 Experimental details and parameters for all surface plasmon experiments included in the  
1295 manuscript. Biacore chips are purchased from Cytiva. HBSp+: 10 mM HEPES, 150 mM NaCl,  
1296 0.05% Tween-20.  
1297

1298 **Table S7. Excel file containing even more data too large to fit in a PDF.**

1299 185 experimental PPIs based on the number of chemical synapses associated with each  
1300 interaction. Interactions where there was no expression data for one or both of the binding  
1301 partners are labeled N/A. We randomize the neuron connectome as a random control.  
1302

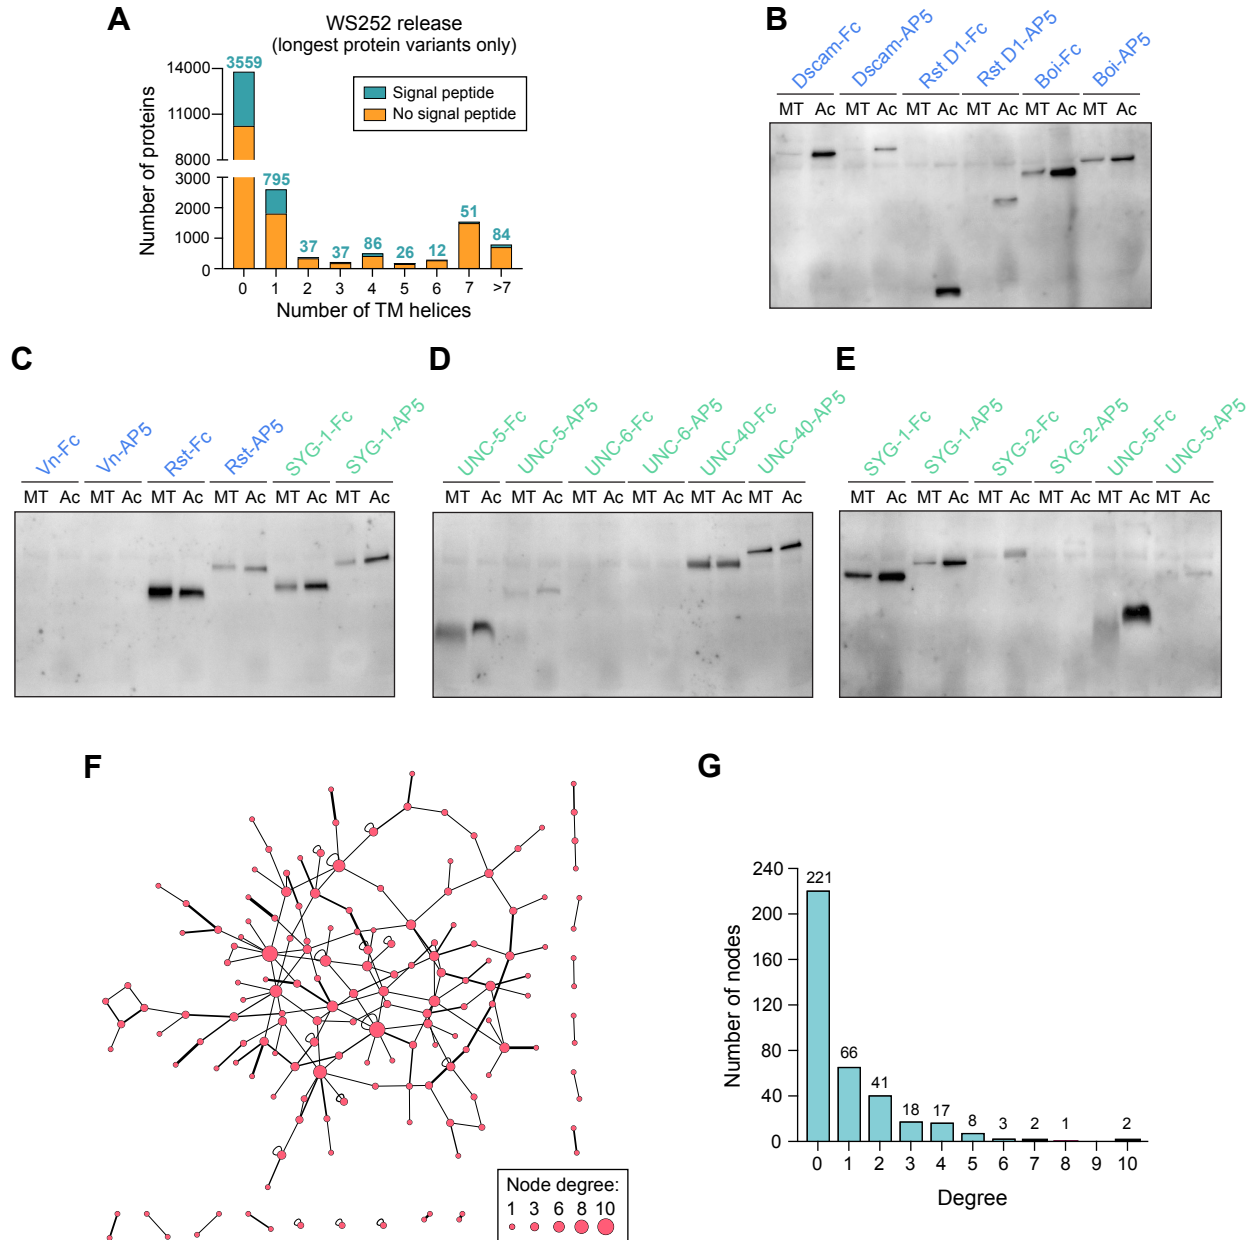

**Figure S1.** Domain collection, protein expression and network analysis.

**A.** Signal peptide and transmembrane helix analysis of the *C. elegans* proteome (WS252 release) shows that 23% of proteins have predicted signal peptides, and 44% of proteins are either membrane-anchored or secreted.

**B-E.** Expression testing of *D. melanogaster* (blue) and *C. elegans* (green) ectodomains in S2 cells using the Metallothionein (MT) and Actin 5C (Ac) promoters. Rst D1 refers to the first immunoglobulin domain of Rst. For MT-driven expression, transiently transfected cells were induced with 0.8 mM CuSO<sub>4</sub> at 16 hours post-transfection. All transfections were collected 88 hours post-transfection for western blotting using a mouse primary anti-His antibody (1:2000) and an Alexa Fluor 488-coupled donkey anti-mouse IgG secondary antibody (1:5000). Overall, the Actin 5C promoter results in higher expression, but not in every case.

**F.** Network of 185 interactions detected with a cutoff of  $z_{\min} > 8.4$  drawn using the organic layout algorithm in Cytoscape, where node size relates to node degree (see the legend), and the edge thickness scales to  $z_{\min}$ .

**G.** The degree distribution of all the interactions depicted in F.



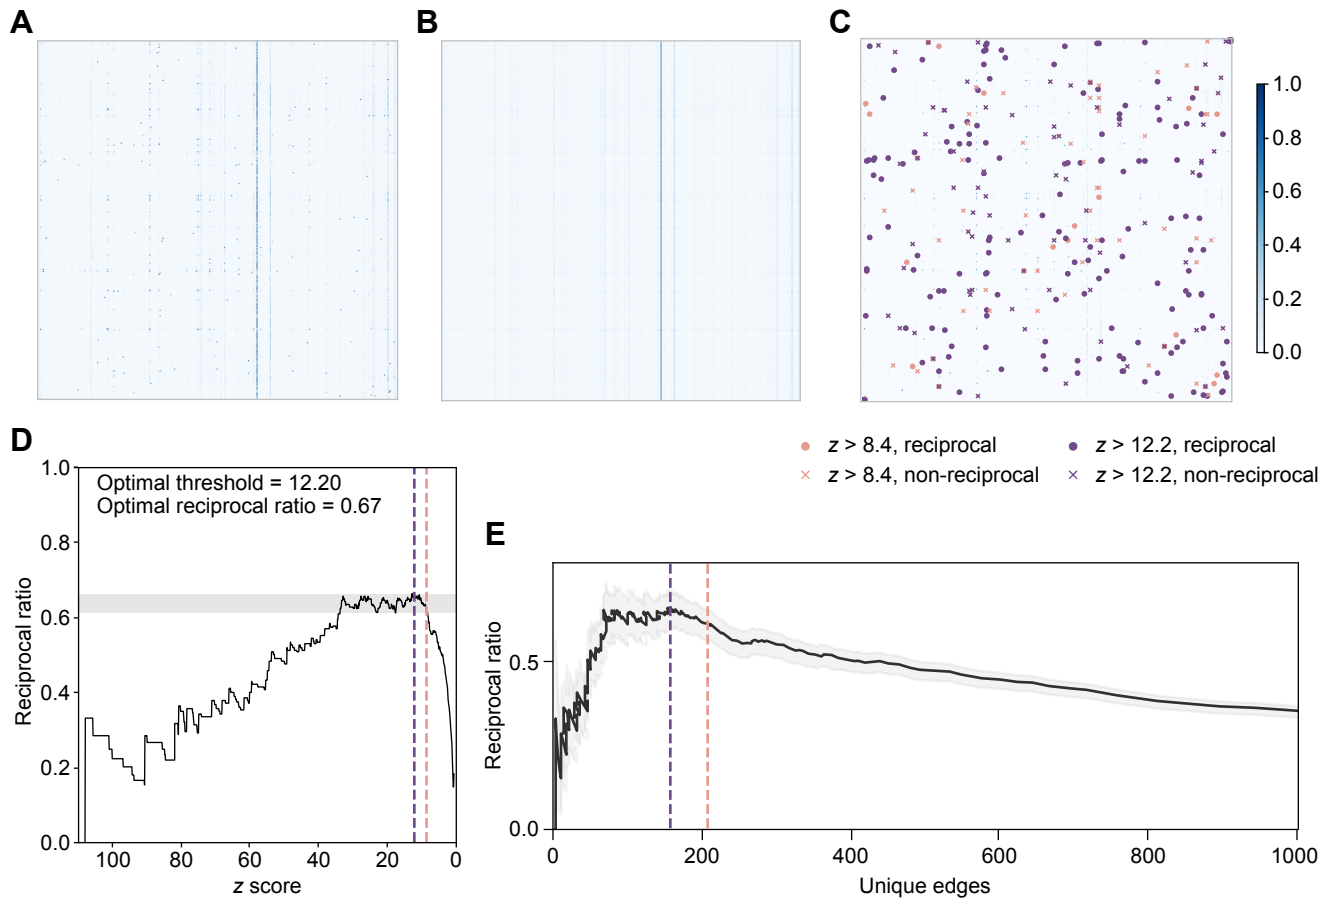

**Figure S2.** MaxEnt model to filter the experimental data.

**A.** The normalized experimental data  $A_n$ .

**B.** The mean of the statistical background model  $P$ .

**C.** The difference between  $A_n$  and  $P$ . PPIs with z-score above intermediate (orange) and stringent (purple) thresholds are shown in matrix form. Reciprocal PPIs are marked with a dot (•) and non-reciprocal PPIs are marked with an 'x'.

**D.** The reciprocal ratio of interactions as a function of the chosen threshold of z-scores. The maximum reciprocal ratio is achieved with  $z = 12.2$ .

**E.** The reciprocal ratio as a function of the number of unique edges identified. The shading represents  $n \pm SE$ , where  $n$  is the number of reciprocal edges.  $SE$  is calculated by the shot noise as  $SE = \sqrt{n}$ .

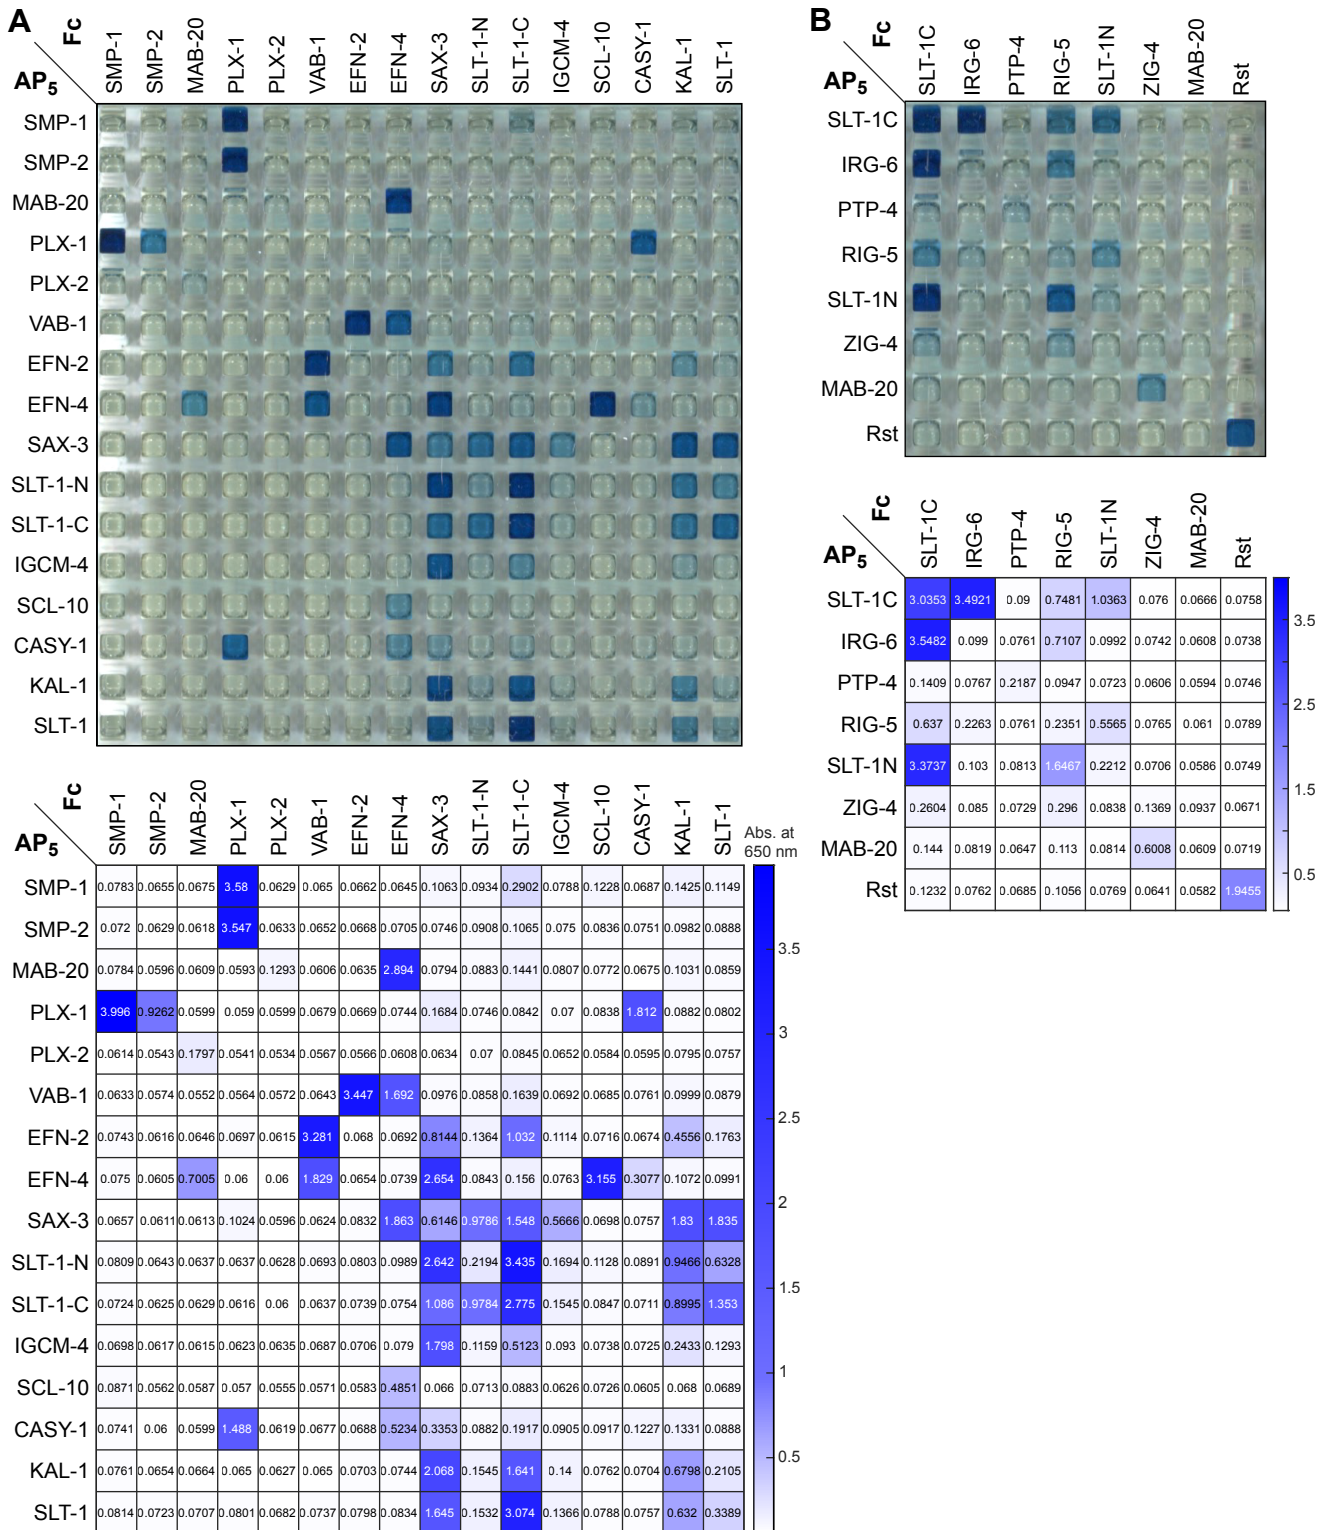

**Figure S3.** Interactions of axon guidance receptors and cues.

**A.** Image of the 384-well plate and absorbance at 650 nm for the ECIA experiment for selected axon guidance-related proteins in Figure 3B.

**B.** ECIA experiment for other guidance-related proteins. *D. melanogaster* Rst is a homodimeric protein and serves as a control.

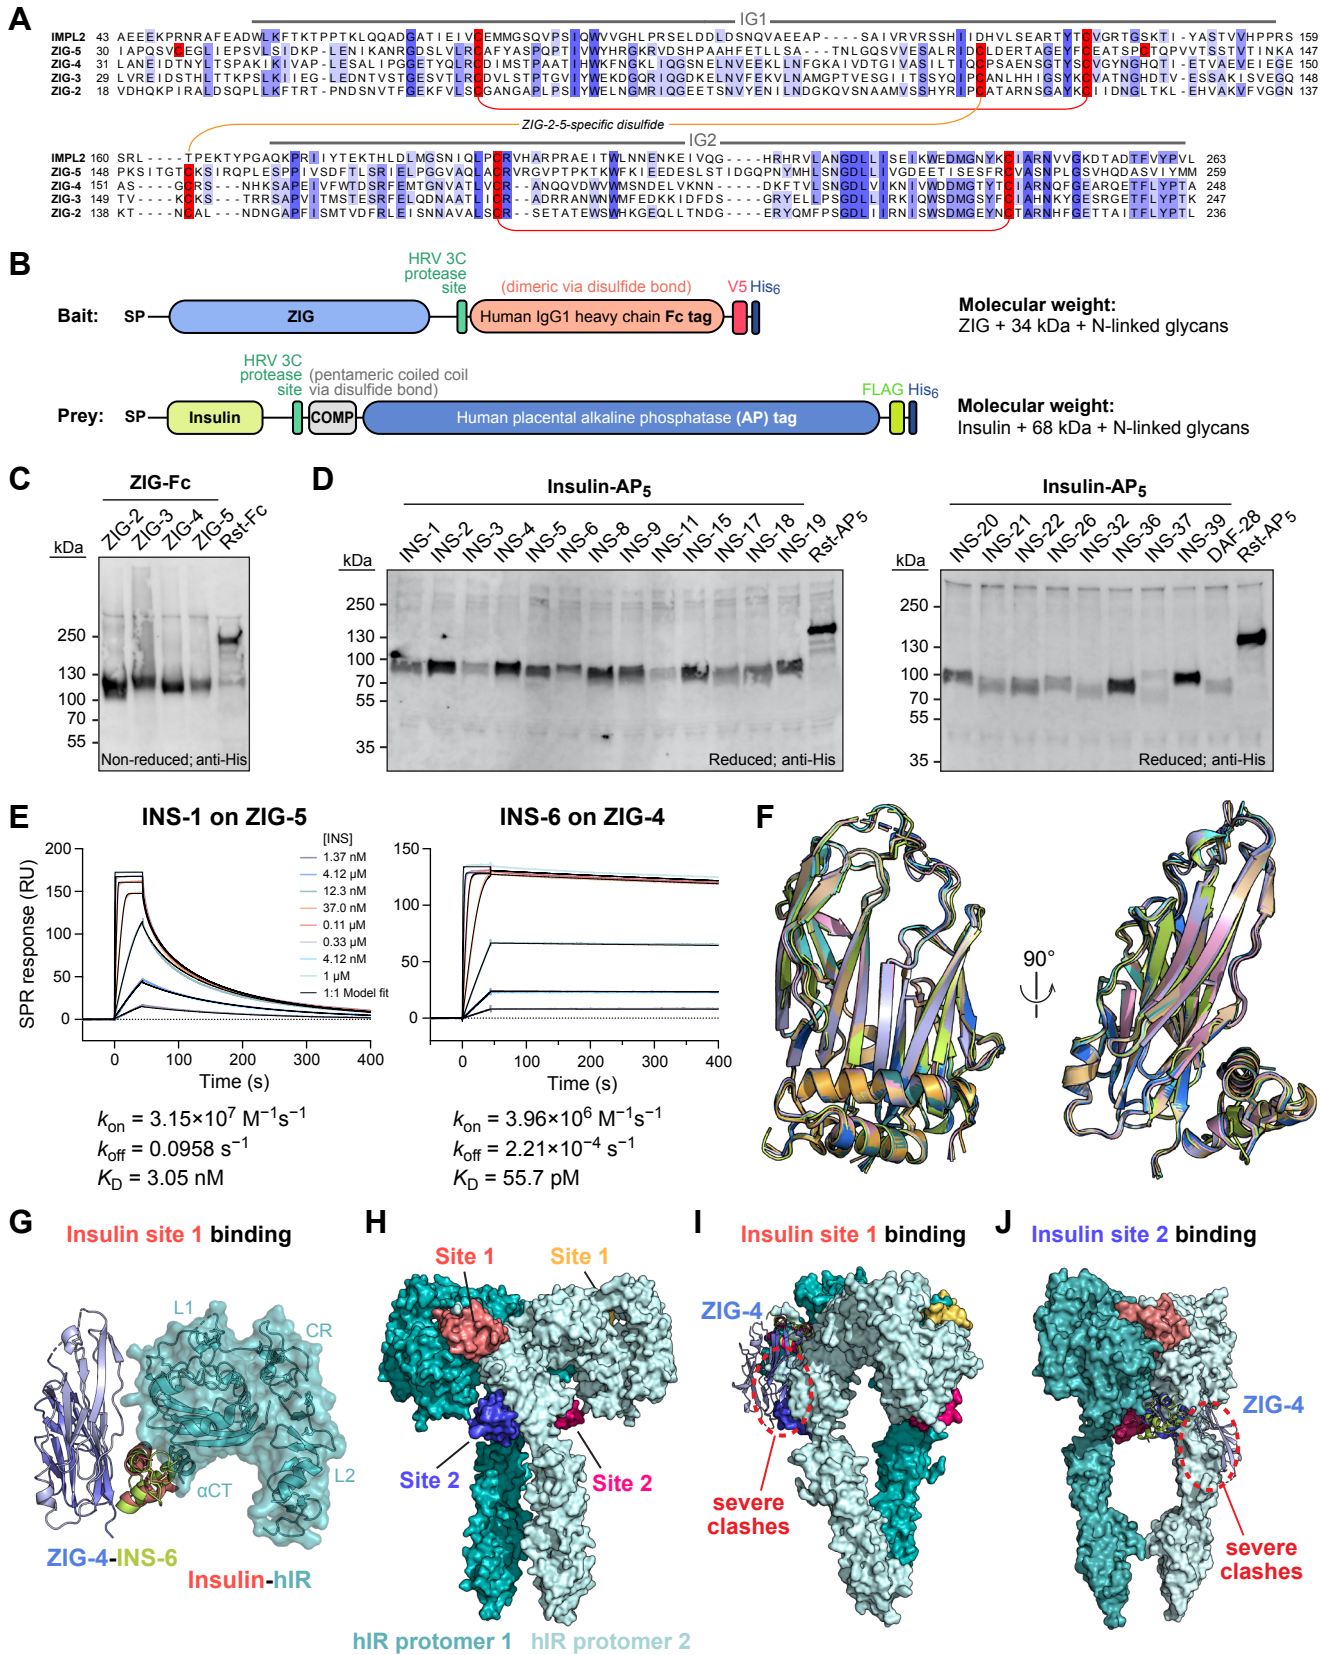

**Figure S4.** The ZIG-insulin interactome.

**A.** Sequence alignment of four ZIGs and the fly ortholog, ImpL2. ZIG-2 to -5 carry a disulfide unique to all worm ZIGs. (continued)

*(continued)*

**B.** The ECIA construct design where ZIGs are depicted as bait and insulins as prey, as used in the experiment presented in Figure 4B.

**C, D.** Expression of all insulin and ZIG constructs used in the experiment presented in Figure 4B. Expression of bait is shown in C and expression of prey in D.

**E.** Kinetic fitting of SPR sensorgrams from Figure 4D with parameters.

**F.** Superposition of three ZIG-4-INS-6 structures solved using three different crystal forms.

**G.** The INS-6-ZIG-4 complex is compatible with insulins interacting with the L1 domains +  $\alpha$ CT helix in insulin receptors. hIR: human insulin receptor; PDB ID: 3W11.

**H.** Structure of the active T-like IR<sub>2</sub>-insulin<sub>4</sub> structure from PDB ID: 6PXV. Four insulin-binding sites are shown in red, yellow, blue and pink.

**I, J.** Insulin-bound ZIG-4 would severely clash with dimeric IR, regardless of insulin binding to site 1 (I), or site 2 (J).



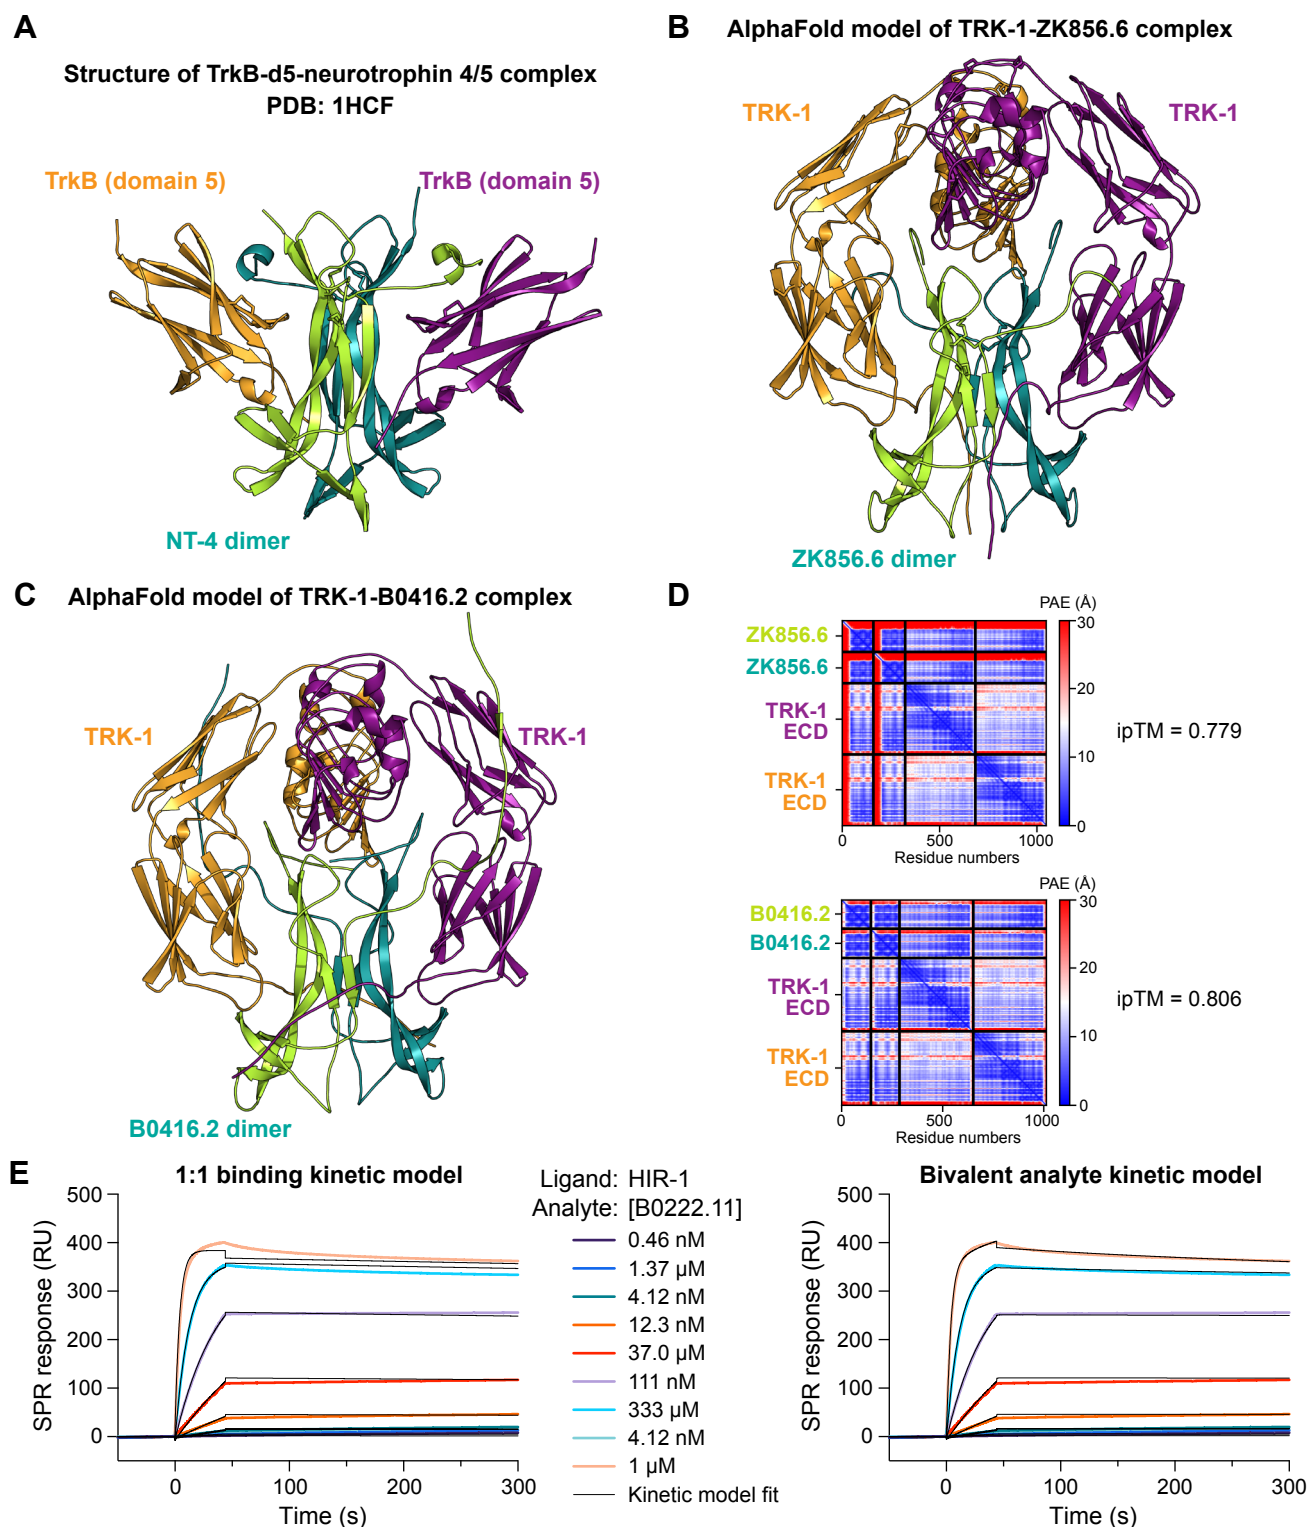

**Figure S5.** Comparison of AlphaFold models of complexes discovered by the ECIA screen with the structure of human ligand-bound neurotrophin receptor.

**A.** Structure of human neurotrophin receptor, TrkB (domain 5) bound to NT4/5 (PDB: 1HCF).

**B.** AlphaFold-predicted TRK-1 ectodomain bound to ZK856.6 at a 2:2 stoichiometry.

**C.** AlphaFold-predicted TRK-1 ectodomain bound to B0416.2 at a 2:2 stoichiometry.

**D.** PAE (Predicted Aligned Error) plots corresponding to models shown in B. and C. High ipTM (interface predicted Template Modelling) scores indicate high-confidence predictions.

**E.** Kinetic fitting of SPR sensorgrams collected for the binding of B0222.11 to HIR-1, shown in Figure 5C.

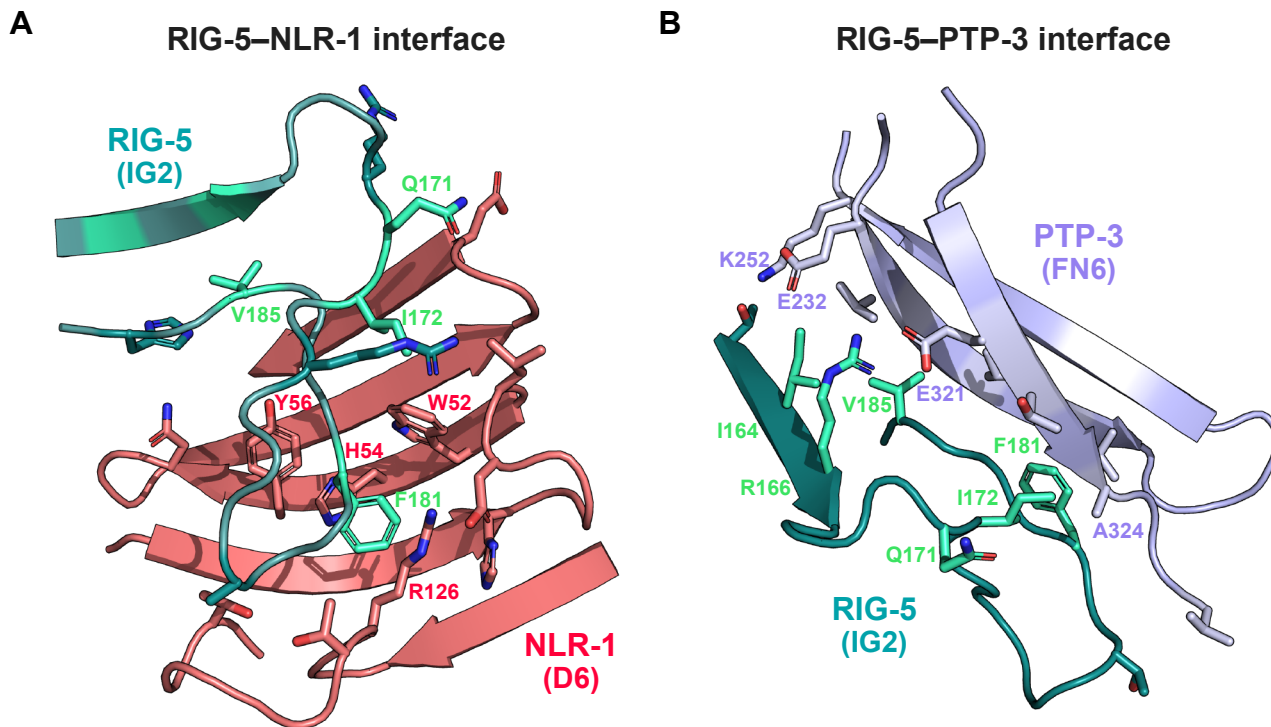

**Figure S6.** Interfaces observed in AlphaFold models of RIG-5-NLR-1 and RIG-5-PTP-3 complexes.

**A.** The AlphaFold-predicted interface of RIG-5 (ECD) bound to NLR-1 (D6).

**B.** The AlphaFold-predicted interface of RIG-5 (ECD) bound to PTP-3 (FN4-6). The RIG-5 residues mutated in the experiment presented in Figure 6H are shown in light cyan in A and B.



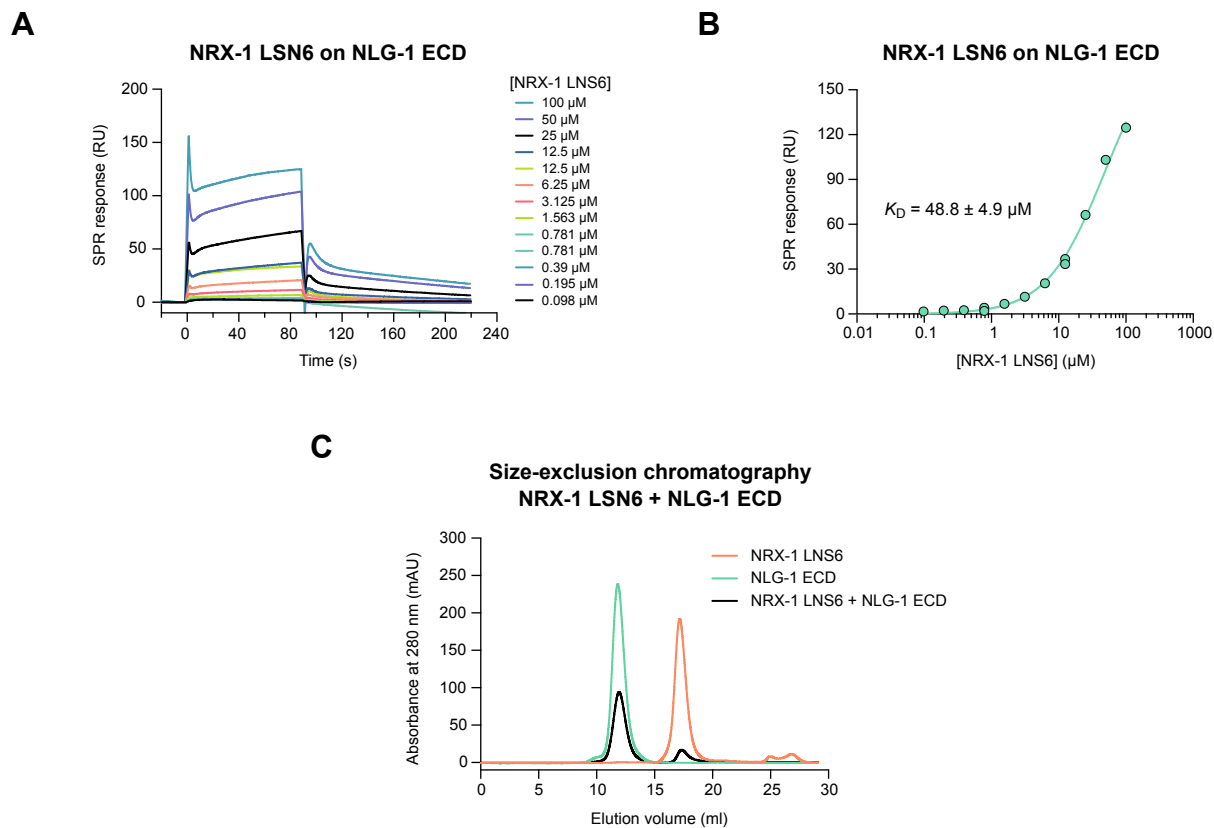

**Figure S7.** Binding experiments for NLG-1–NRX-1 complex.

**A.** SPR sensorgrams for soluble NRX-1 LNS6 domain binding to immobilized NLG-1 ECD.

**B.** Binding isotherm and  $K_D$  for binding shown in A.

**C.** Size-exclusion chromatography runs for NRX-1 LNS-6 (orange), NLG-1 ECD (green) and the mixed sample (black).

**Table S5.** Data and refinement statistics for x-ray crystallography of the ZIG-4–INS-6 complex.

|                                                 | <b>Tetragonal form</b>  | <b>C-centered monoclinic</b> | <b>Primitive monoclinic</b> |
|-------------------------------------------------|-------------------------|------------------------------|-----------------------------|
| <b>Data Collection</b>                          |                         |                              |                             |
| Beamline                                        | APS 24-ID-E             | APS 24-ID-E                  | APS 24-ID-E                 |
| Space Group                                     | $P4_22_12$              | $C2$                         | $P2_1$                      |
| <i>Cell Dimensions</i>                          |                         |                              |                             |
| $a, b, c$ (Å)                                   | 74.528, 74.528, 107.058 | 166.430, 56.654, 73.685      | 73.839, 55.739, 149.945     |
| $\alpha, \beta, \gamma$ (°)                     | 90, 90, 90              | 90, 113.247, 90              | 90, 93.775, 90              |
| Resolution (Å)*                                 | 200-1.30 (1.38-1.30)    | 200-2.30 (2.44-2.30)         | 200-2.35 (2.49-2.35)        |
| $R_{\text{sym}}$ (%)                            | 4.6 (120.1)             | 7.1 (113.1)                  | 6.2 (124.8)                 |
| $\langle I \rangle / \langle \sigma(I) \rangle$ | 24.0 (1.78)             | 9.7 (1.1)                    | 10.7 (0.9)                  |
| $CC_{1/2}$                                      | 0.999 (0.742)           | 0.998 (0.652)                | 0.998 (0.463)               |
| Completeness (%)                                | 99.8 (99.4)             | 98.4 (96.7)                  | 97.9 (97.1)                 |
| Redundancy                                      | 12.8 (12.2)             | 3.4 (3.3)                    | 3.1 (3.1)                   |
| <b>Refinement</b>                               |                         |                              |                             |
| Resolution (Å)*                                 | 50-1.30 (1.32-1.30)     | 53.13-2.30 (2.38-2.30)       | 74.81-2.35 (2.60-2.50)      |
| Reflections                                     | 73,784                  | 27,969                       | 50,096                      |
| $R_{\text{cryst}}$ (%)                          | 14.47 (27.19)           | 21.52 (43.52)                | 19.66 (38.72)               |
| $R_{\text{free}}$ (%)**                         | 16.89 (31.58)           | 25.18 (47.21)                | 23.98 (44.33)               |
| <i>Number of atoms</i>                          |                         |                              |                             |
| Protein                                         | 2,128                   | 3,878                        | 7,755                       |
| Ligand/Glycans                                  | 11                      | 0                            | 0                           |
| Water                                           | 305                     | 7                            | 39                          |
| <i>Average B-factors (Å<sup>2</sup>)</i>        |                         |                              |                             |
| All                                             | 24.8                    | 76.2                         | 83.1                        |
| Protein                                         | 23.0                    | 76.3                         | 83.2                        |
| Ligand                                          | 36.3                    | N/A                          | N/A                         |
| Solvent                                         | 37.0                    | 60.2                         | 57.5                        |
| <i>R.m.s. deviations from ideality</i>          |                         |                              |                             |
| Bond Lengths (Å)                                | 0.012                   | 0.003                        | 0.008                       |
| Bond Angles (°)                                 | 1.291                   | 0.631                        | 1.002                       |
| <i>Ramachandran plot</i>                        |                         |                              |                             |
| Favored (%)                                     | 98.41                   | 96.67                        | 97.24                       |
| Outliers (%)                                    | 0.40                    | 0.00                         | 0.00                        |
| Rotamer Outliers (%)                            | 0.43                    | 0.48                         | 0.39                        |
| All-atom Clashscore <sup>‡</sup>                | 3.34                    | 3.31                         | 3.91                        |

\* The values in parentheses are for reflections in the highest resolution bin.

\*\* 5% of reflections (3,747) for tetragonal crystals, 5% of reflections (1,373) for C-centered monoclinic crystals, and 4% of reflections (1,977) for primitive monoclinic crystals were not used during refinement for cross validation purposes.

‡ Clashscores were calculated by *phenix.refine* (Phenix version 1.21).

N/A: Not applicable.
